# Supplementary material for: H1N1 influenza vaccination in HIV-infected women on effective antiretroviral treatment did not induce measurable antigen-driven proliferation of the HIV-1 proviral reservoir
Source: Springer Nature journal article supplement (doi:10.1186/s12981-017-0135-1), 2017-02-13

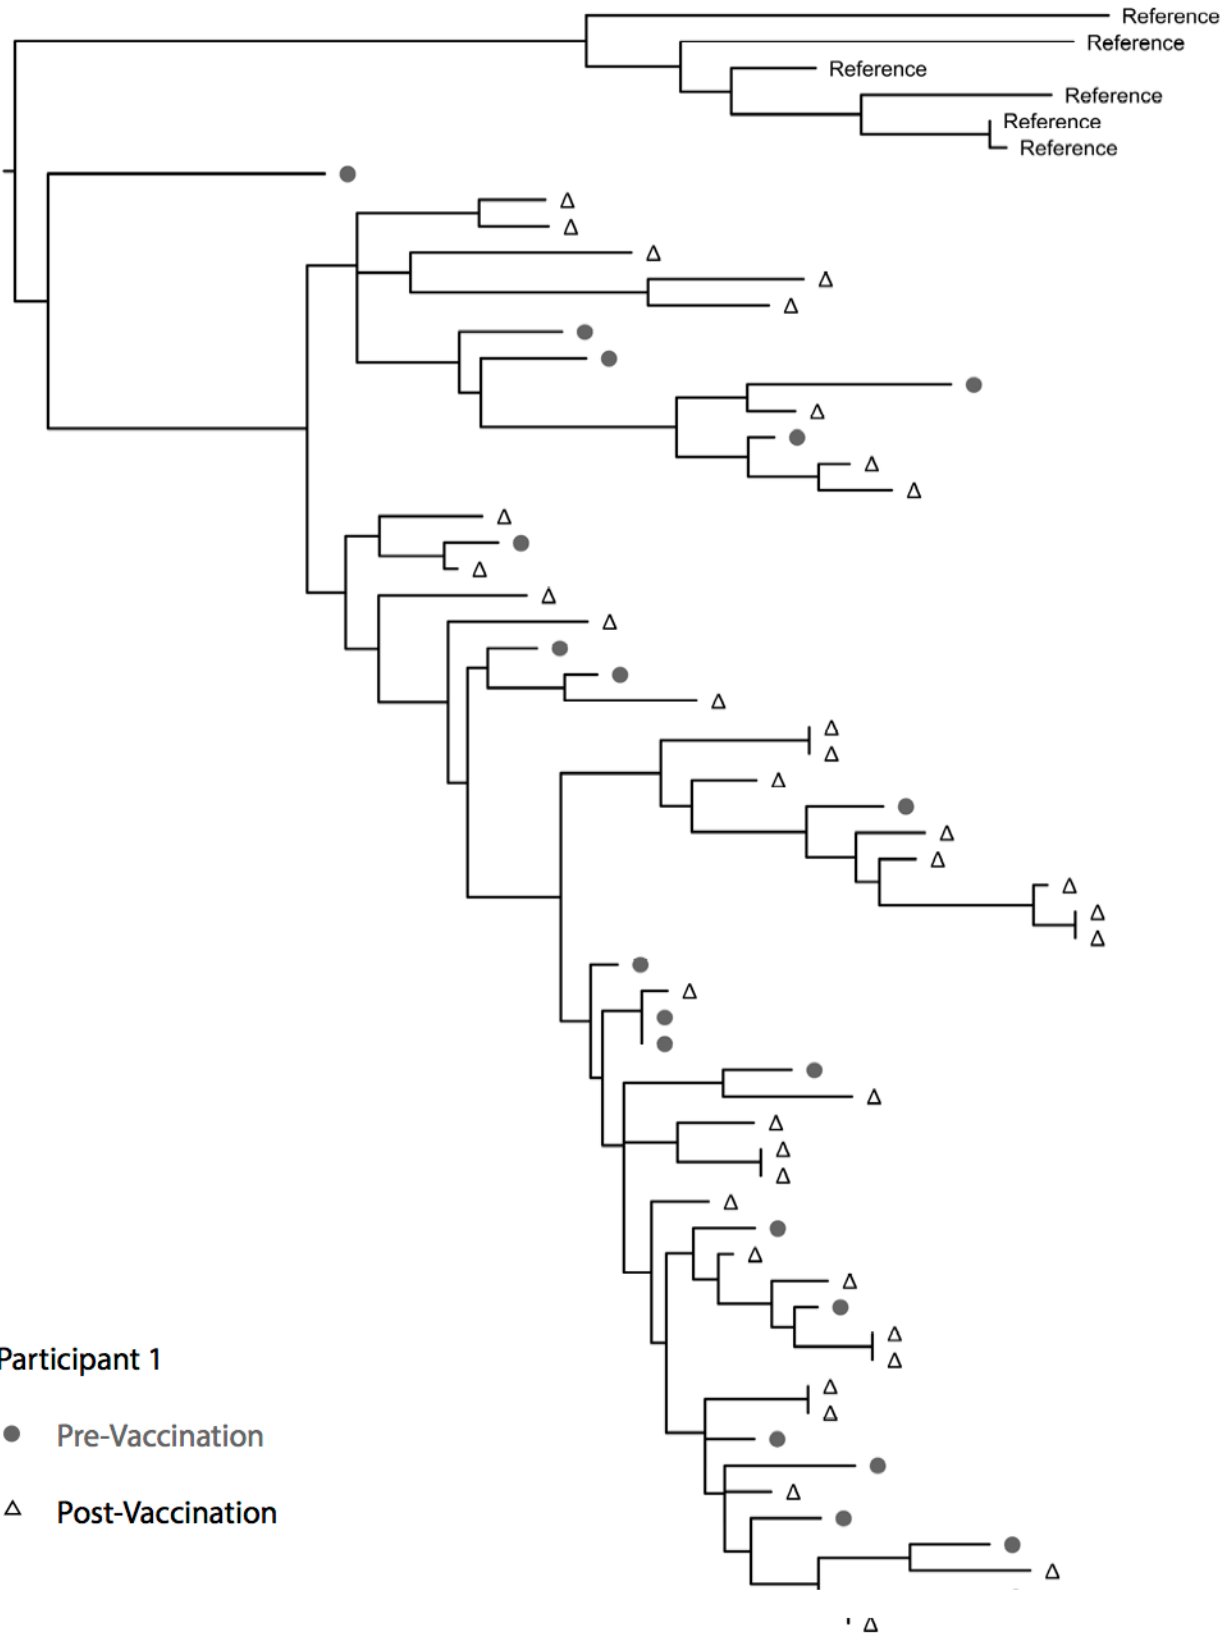

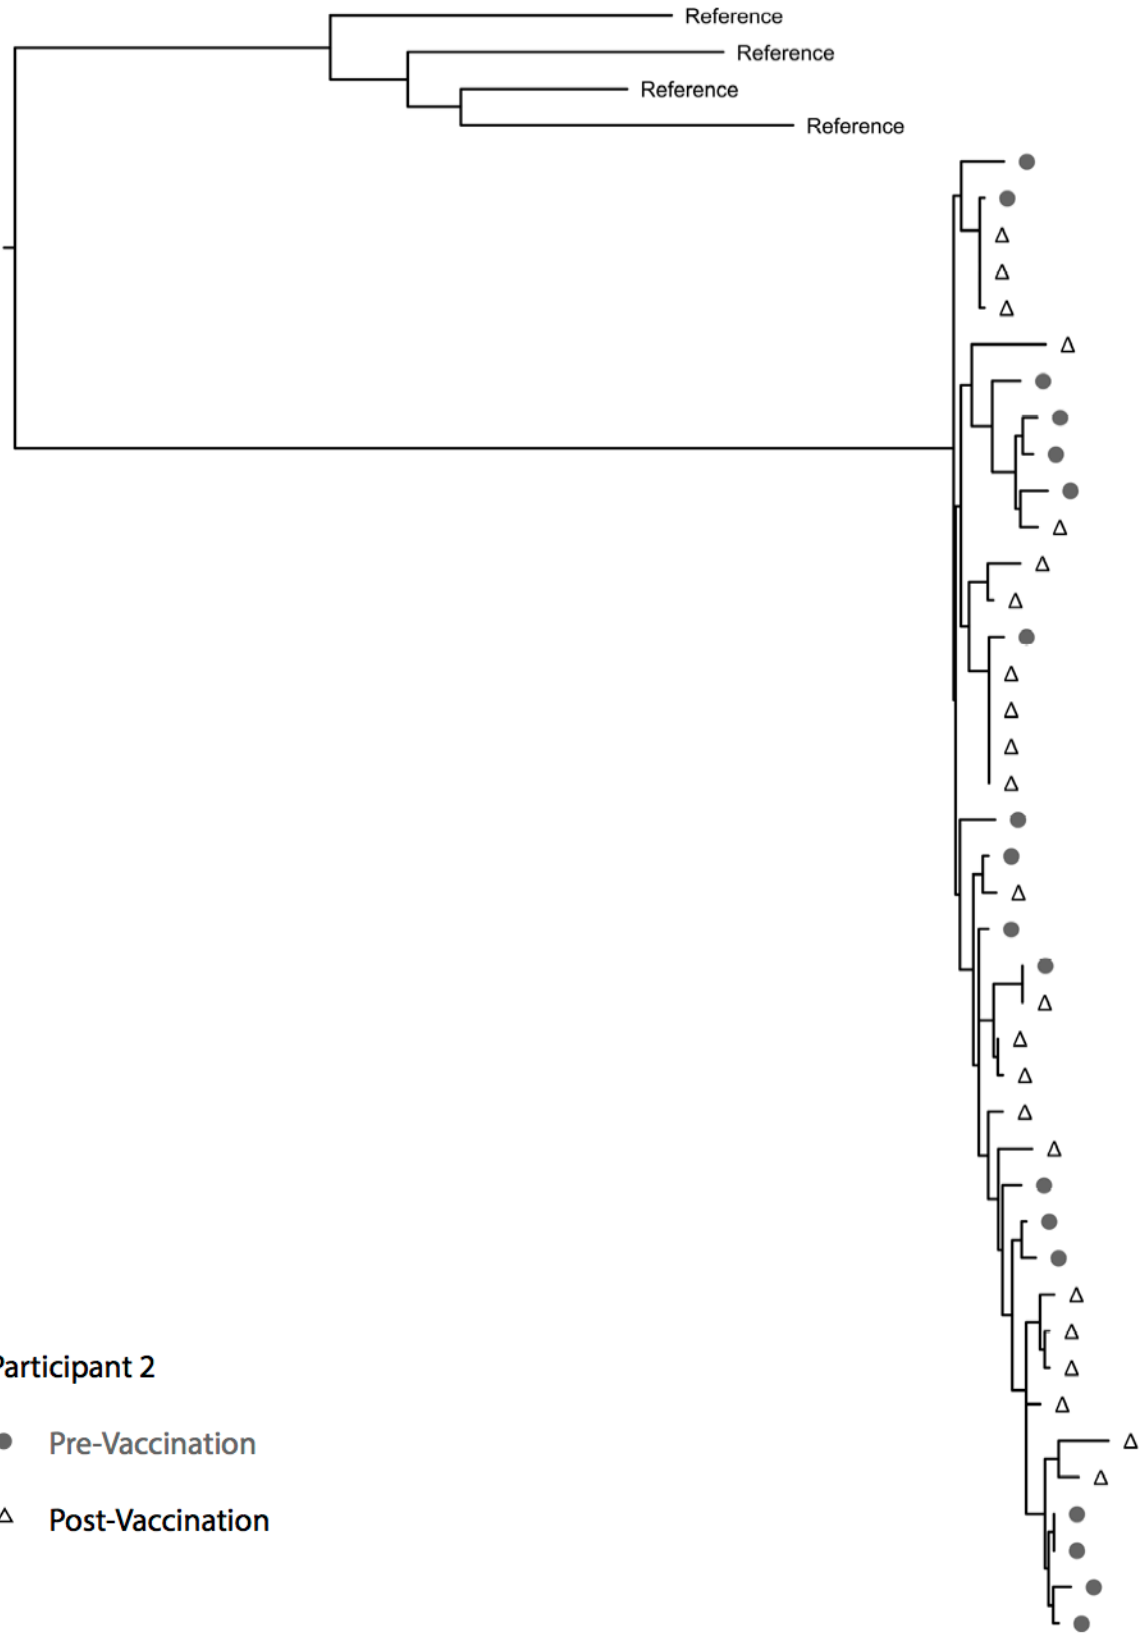

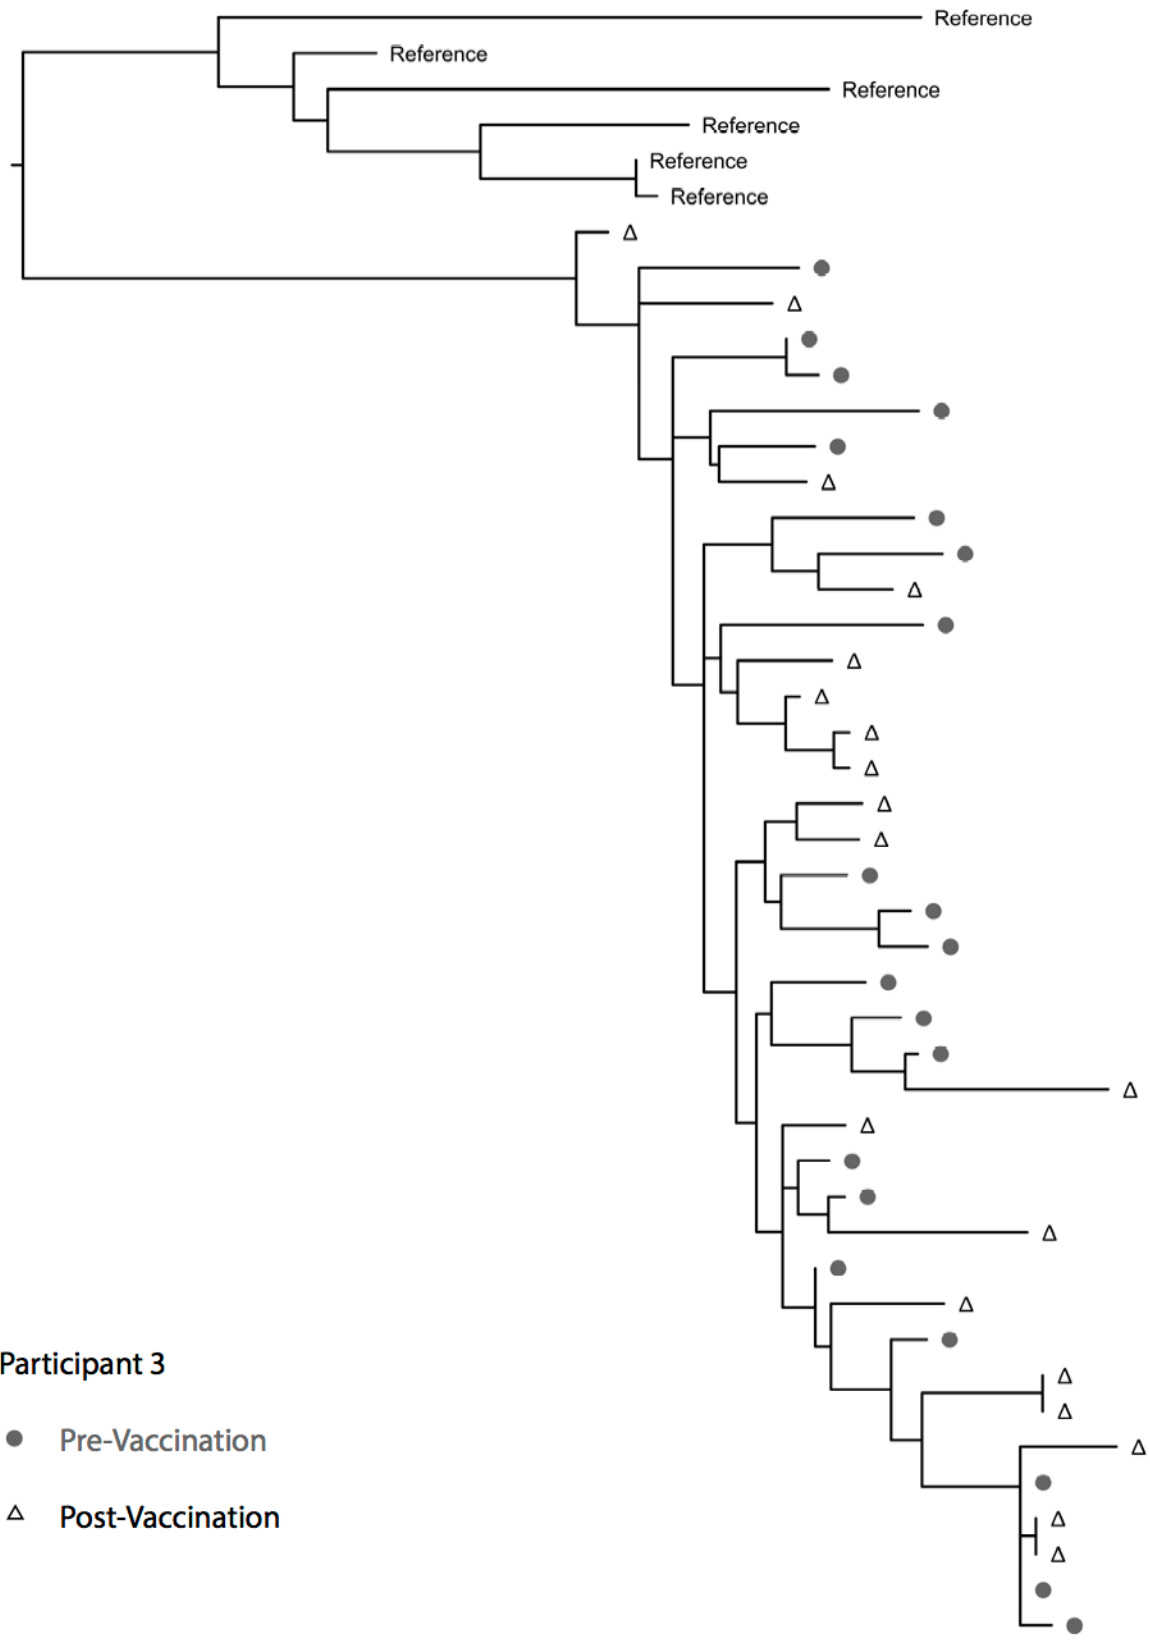

Participant 3

- Pre-Vaccination
- △ Post-Vaccination

0.02

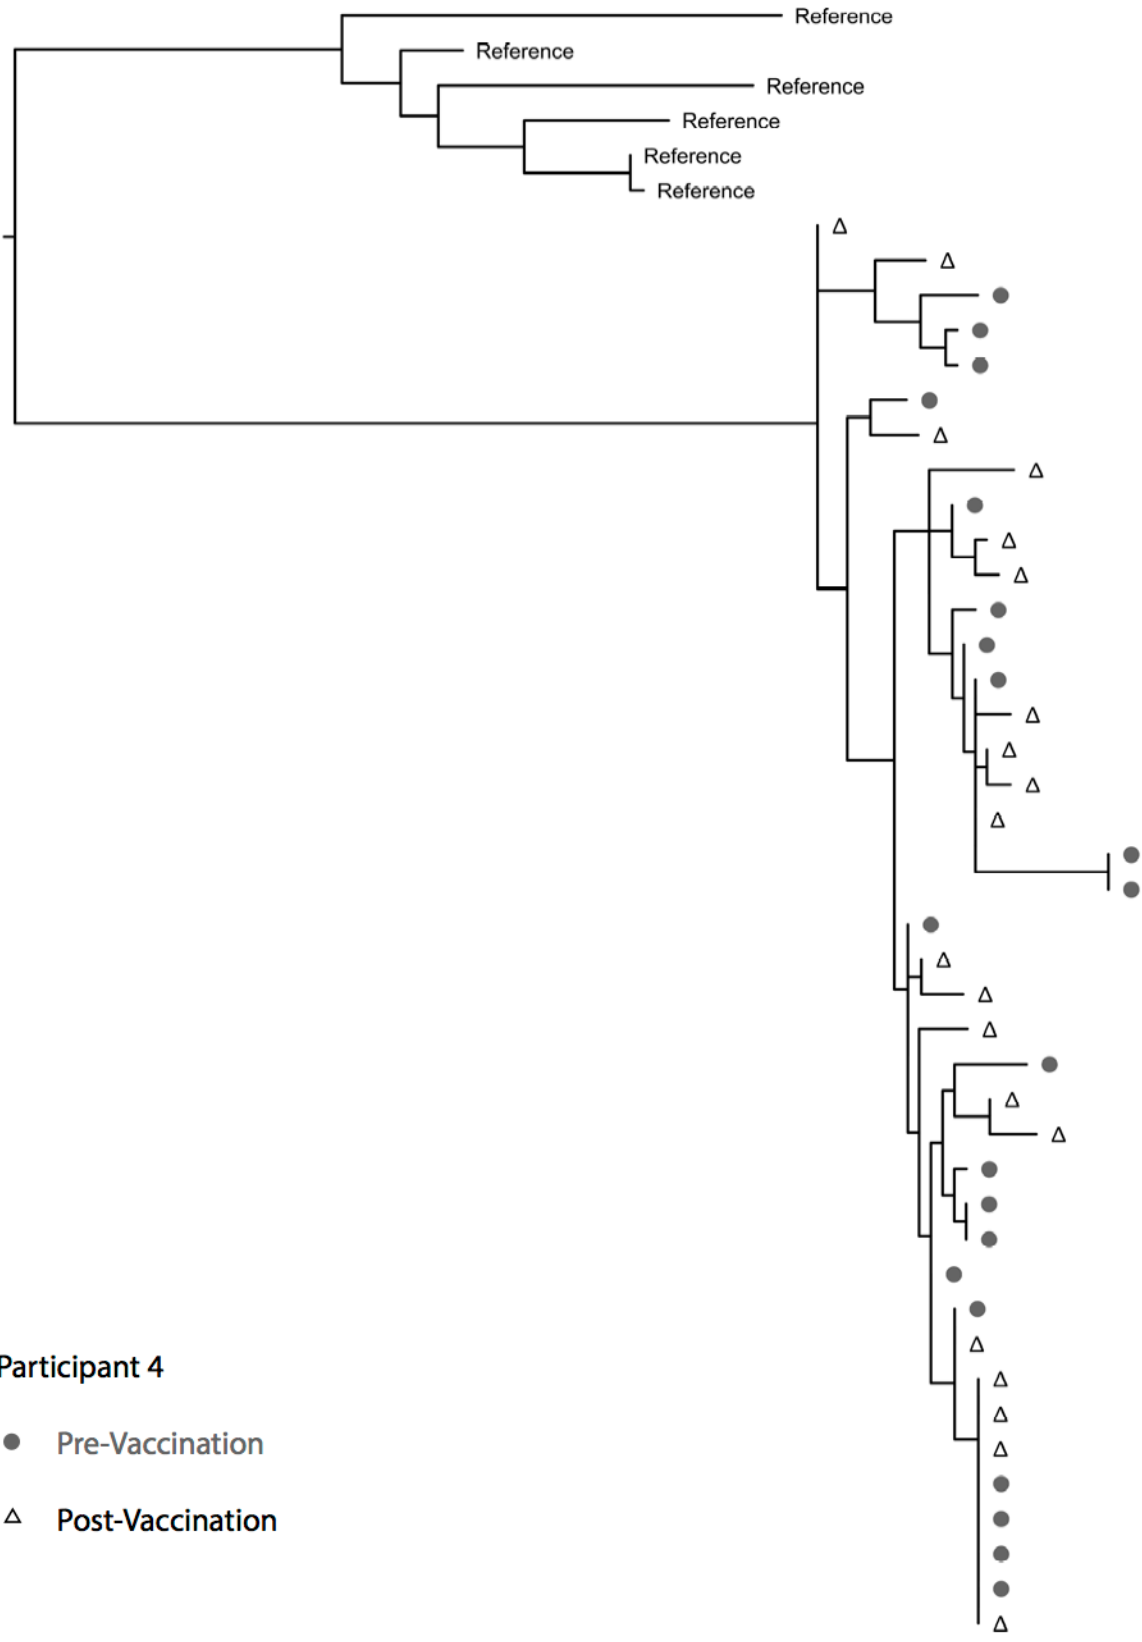

**Participant 4**

- Pre-Vaccination
- △ Post-Vaccination

0.02

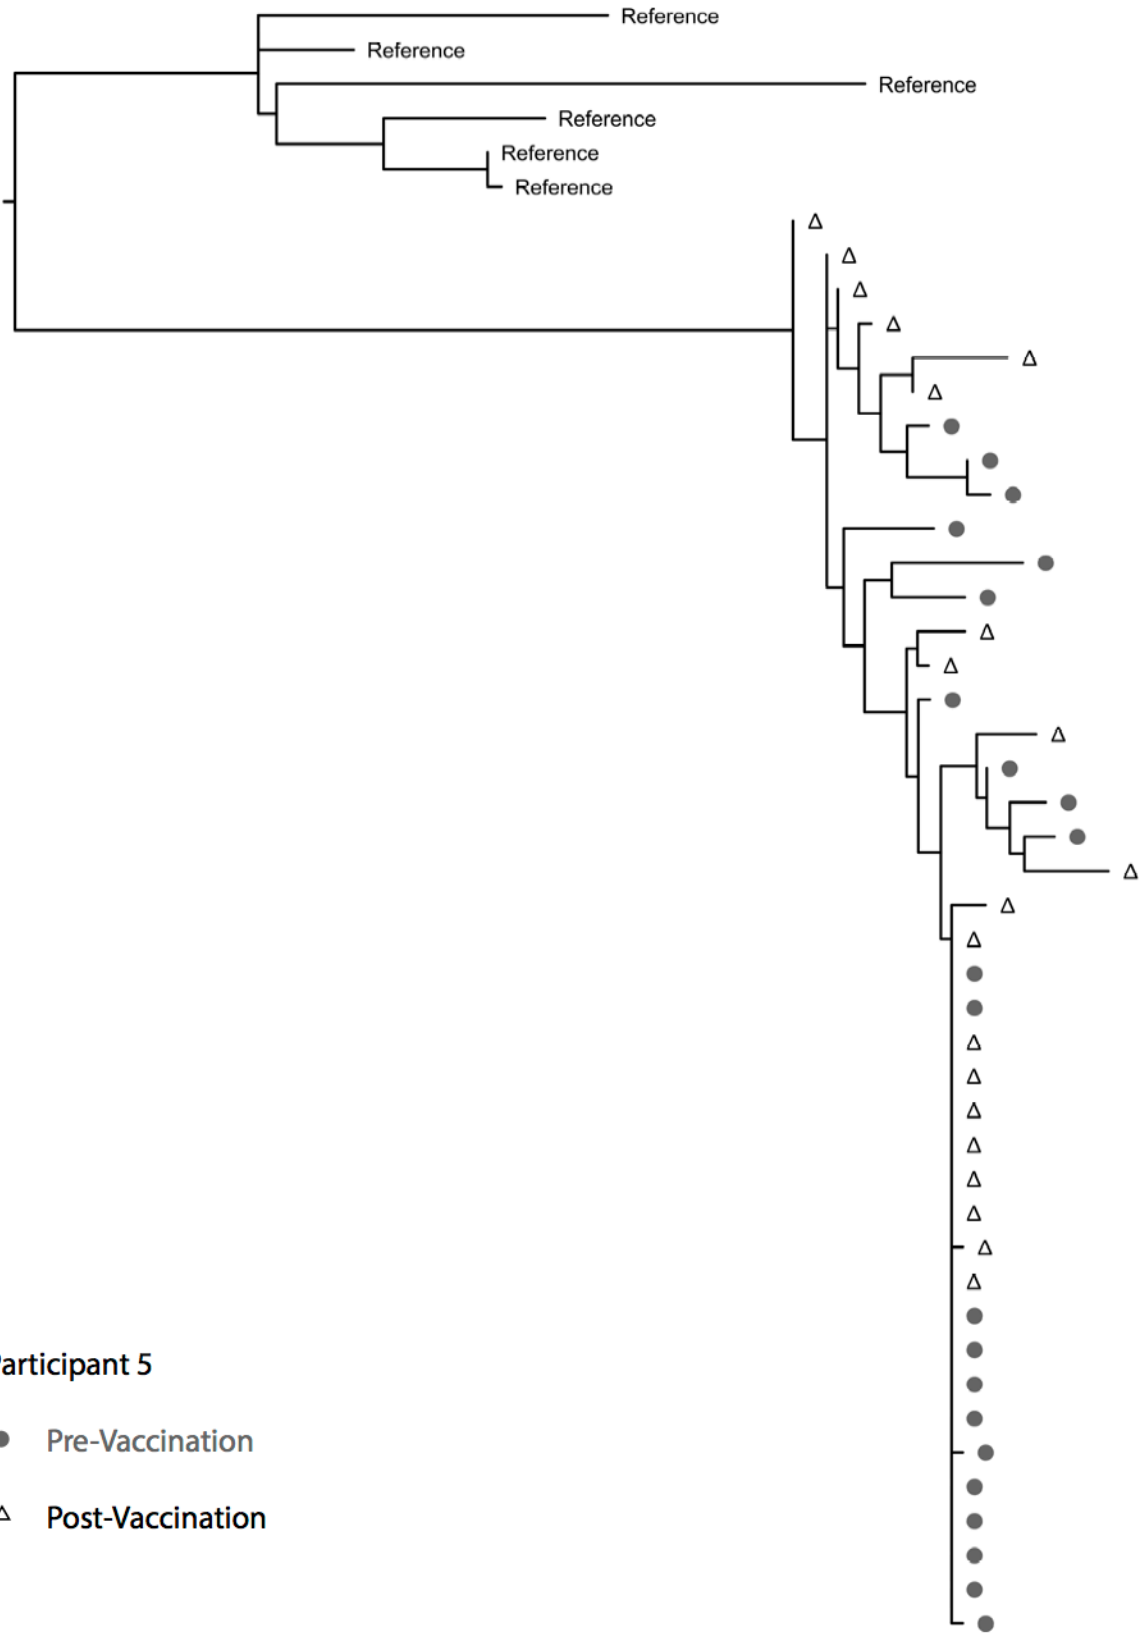

Participant 5

● Pre-Vaccination

△ Post-Vaccination

0.02

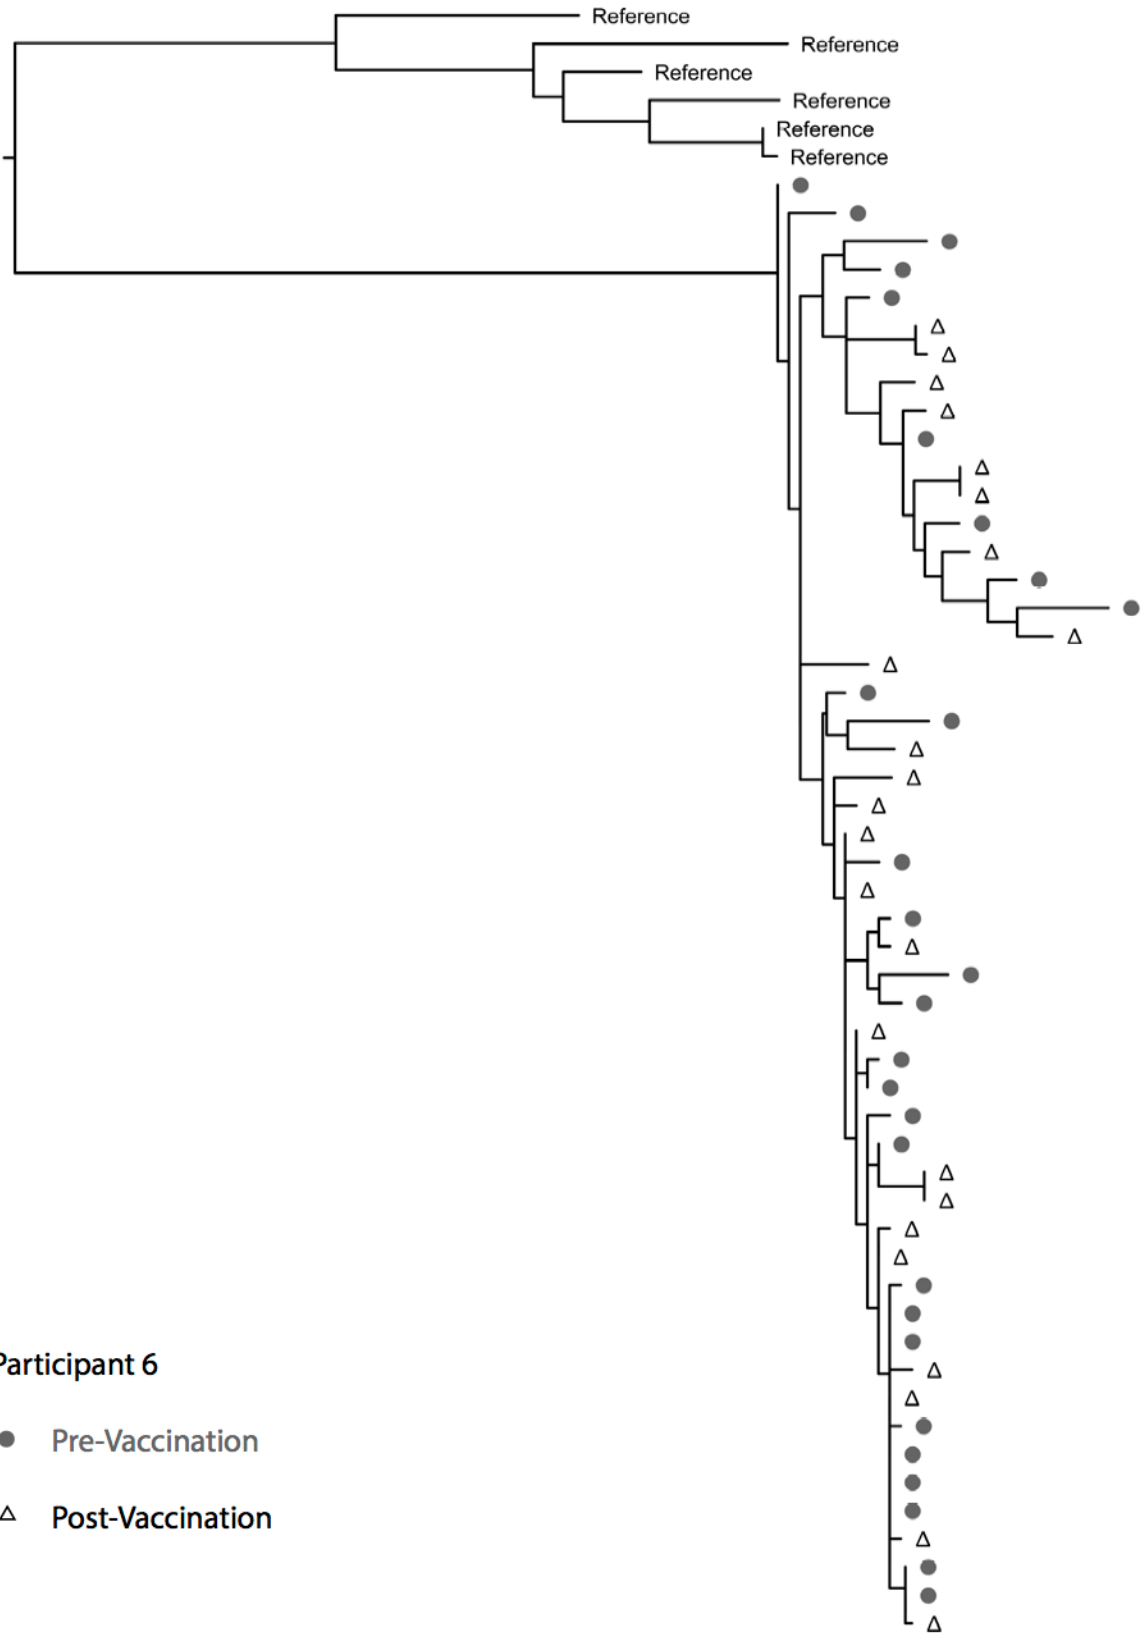

Participant 6

- Pre-Vaccination
- △ Post-Vaccination

---

0.02

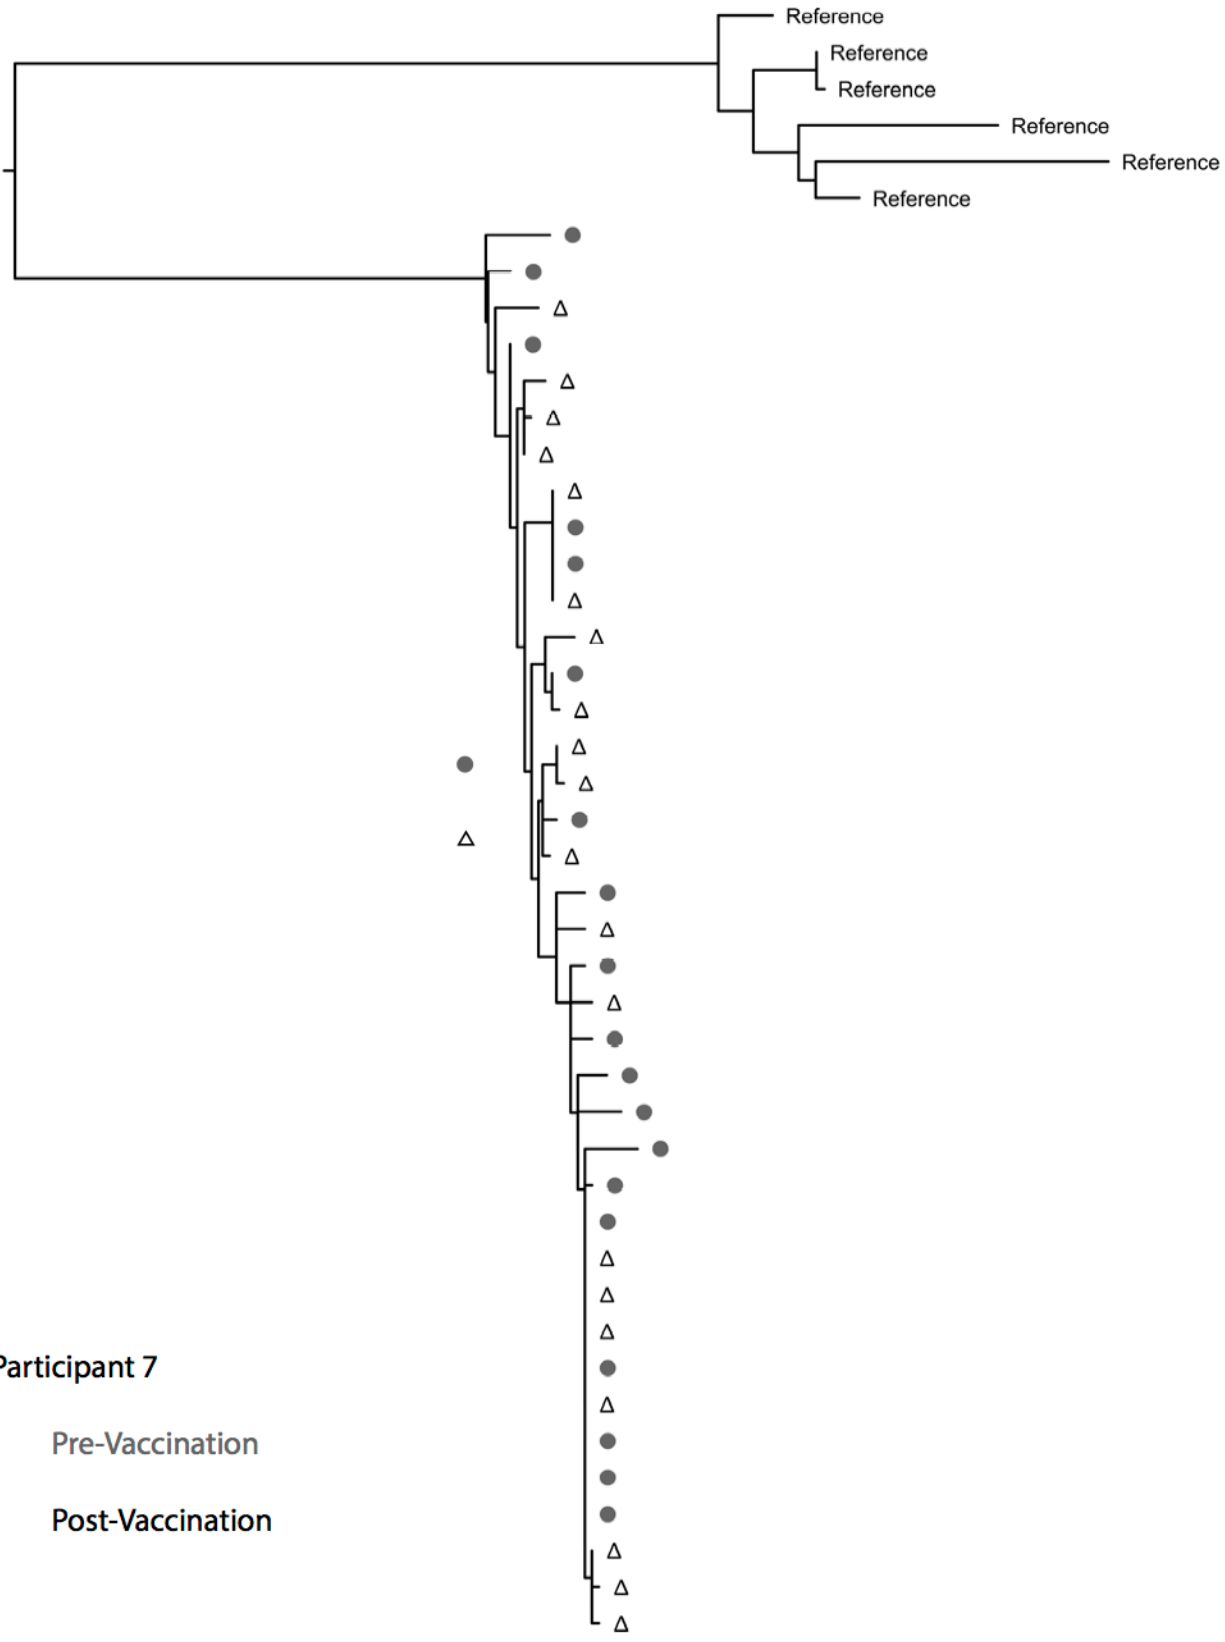

Participant 7

Pre-Vaccination

Post-Vaccination

0.02

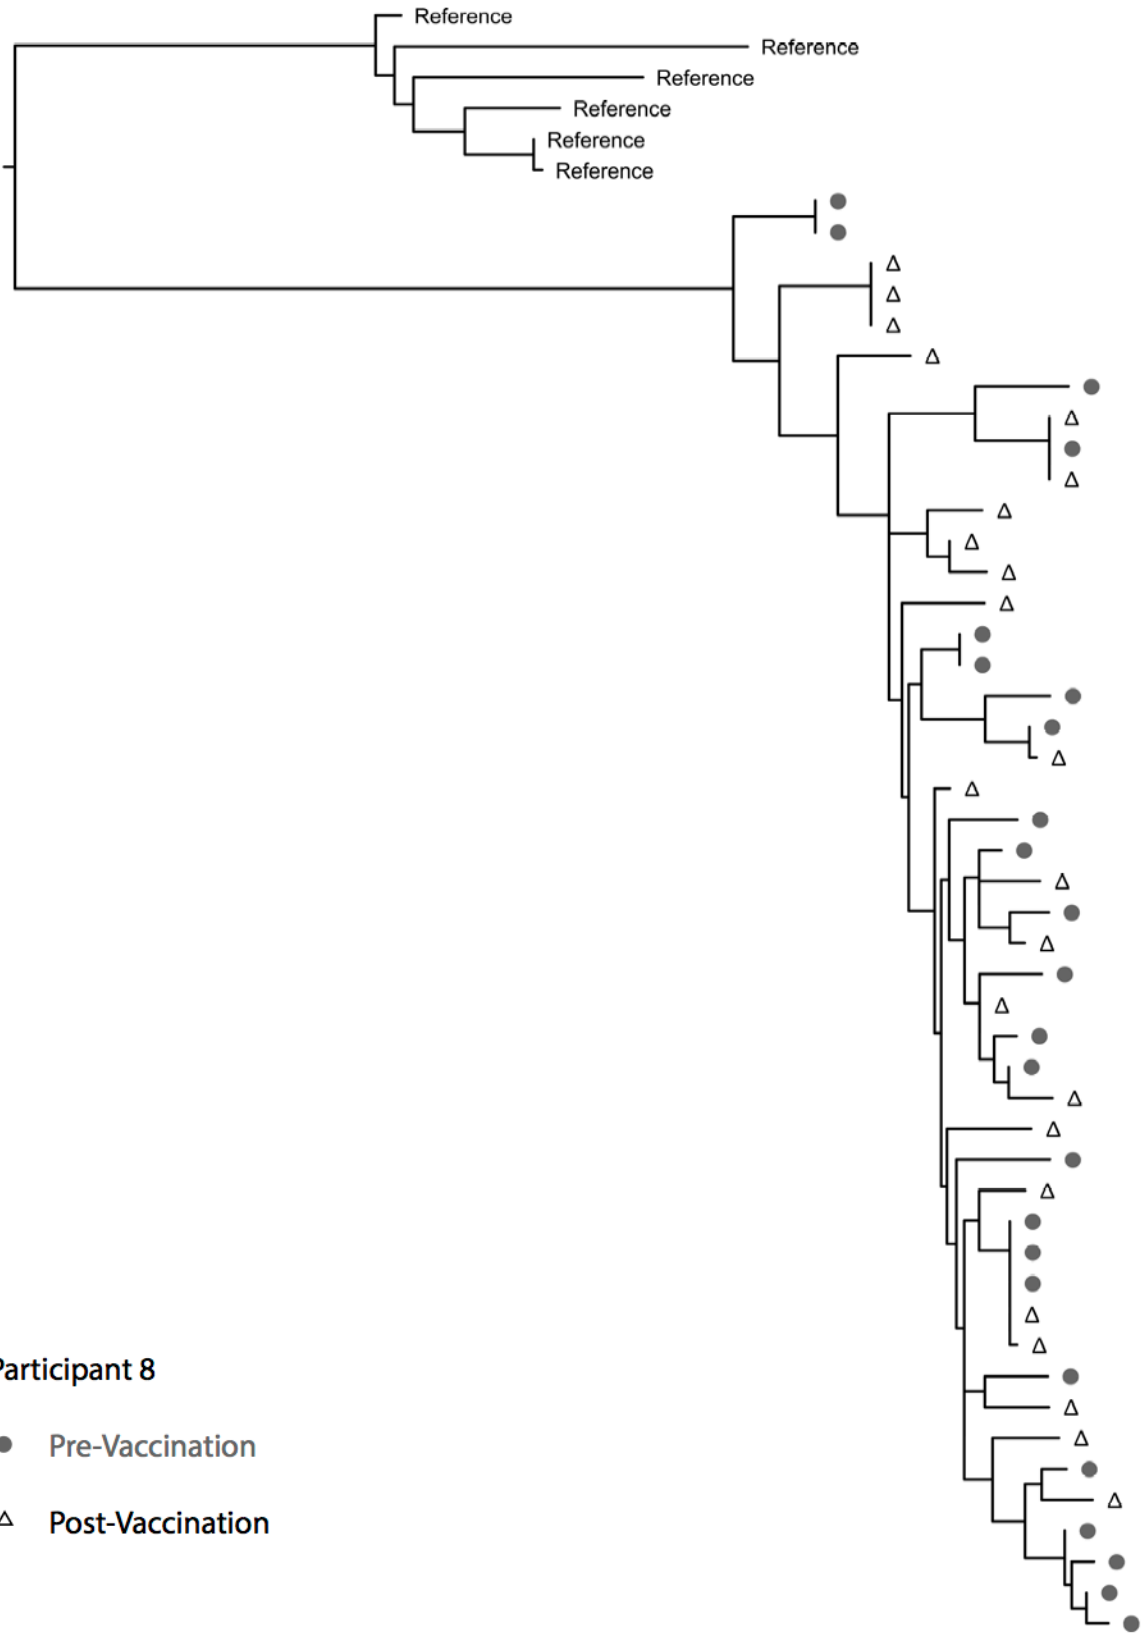

**Participant 8**

● Pre-Vaccination

△ Post-Vaccination

0.02



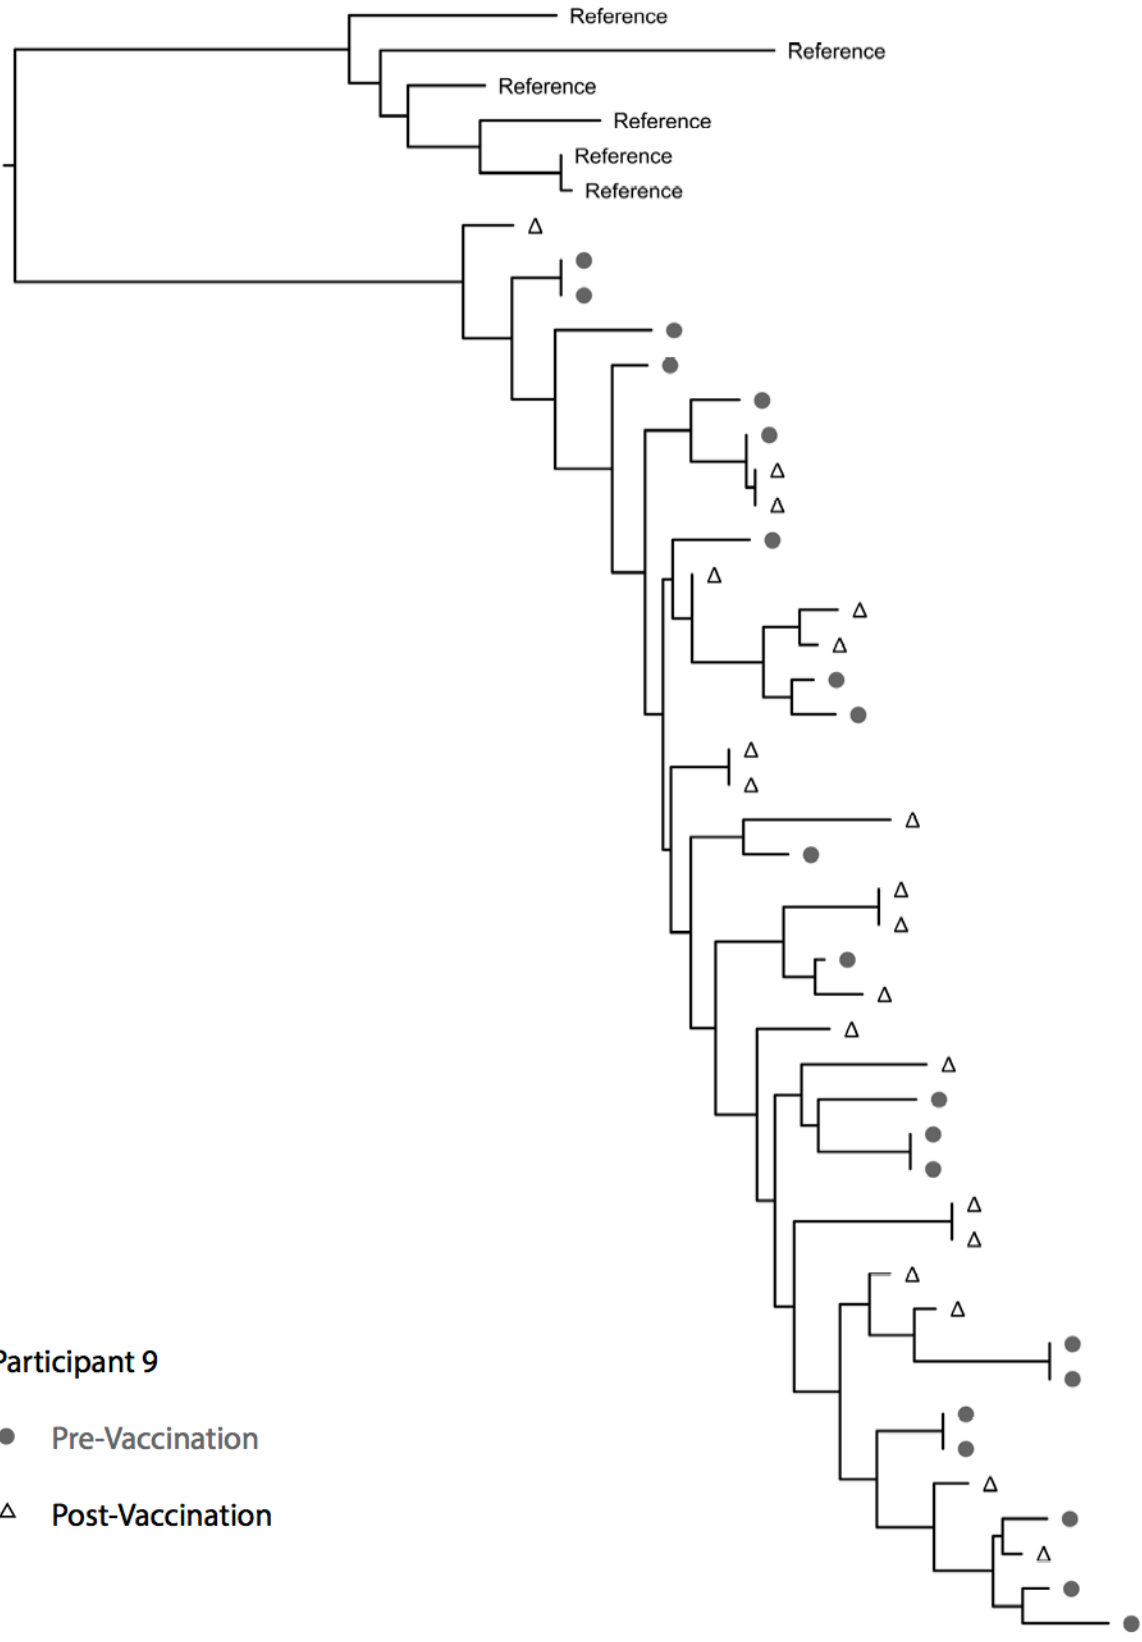

**Participant 9**

● Pre-Vaccination

△ Post-Vaccination

0.02

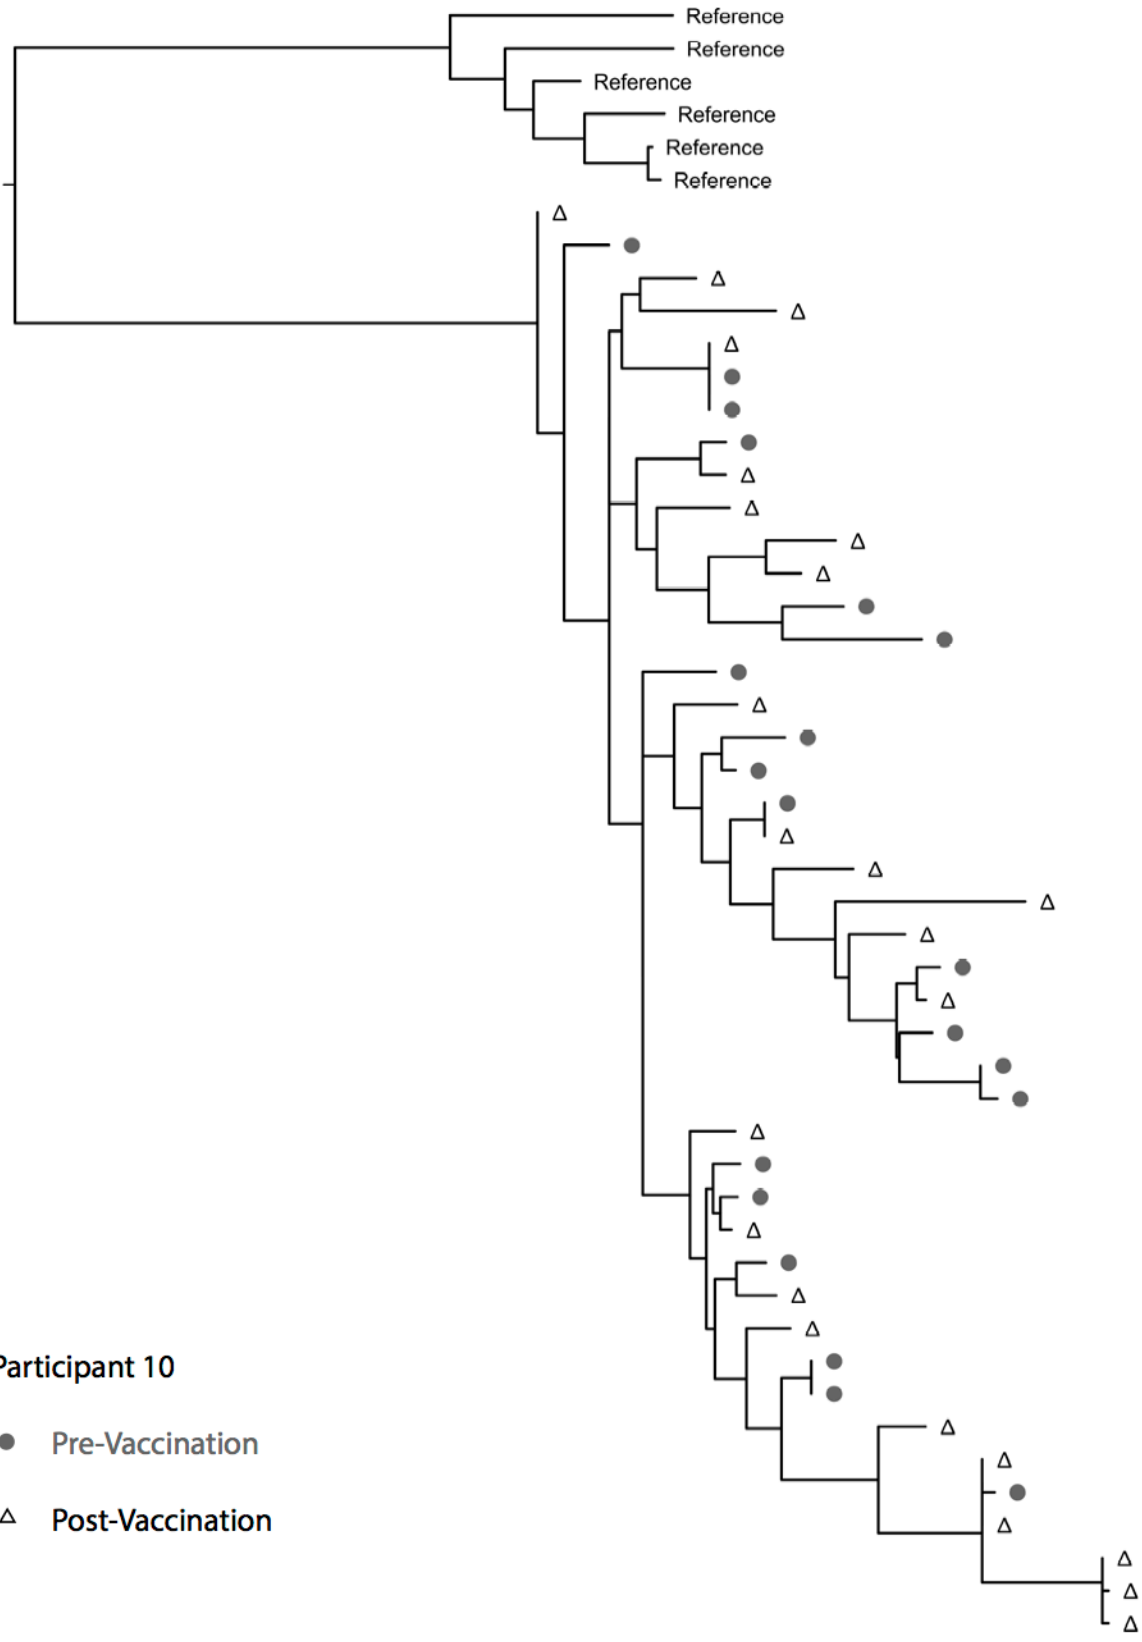

Supplement: MOESM1 [file 12063250]
